# Supplementary material for: LIBERATE: a study protocol for midodrine for the early liberation from vasopressor support in the intensive care unit (LIBERATE): protocol for a randomized controlled trial
Source: PubMed Central journal article supplement (PMC8896263; doi:10.1186/s13063-022-06115-0), 2022-03-04
Supplement: 13063_2022_6115_MOESM1_ESM.pdf [file 13063_2022_6115_MOESM1_ESM.pdf]

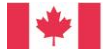

03 April 2020

Dr. Oleska Rewa  
Assistant Professor, Department of Critical Care Medicine  
The Governors of the University of Alberta  
2-124 Clinical Sciences Bldg, 8440-112 Street  
EDMONTON, Alberta  
T6G 2B7  
**(780) 231-3280**

Your file / Votre référence  
**HC6-24-c236428**  
Our file / Notre référence

**No Objection Letter RE: Protocol # PRO00096716 (Version 7)**

Dear Dr. Rewa:

I am pleased to inform you that the information and material to support your Clinical Trial Application for **MIDODRINE**, control number **236428**, received on March 6, 2020, have been reviewed and we have no objection to your proposed study. I would remind you of the necessity of complying with the *Food and Drug Regulations*, Division 5, in the sale of this product for clinical testing. In addition, the regulations impose record keeping responsibilities on those conducting clinical trials. You are also reminded that all clinical trials should be conducted in compliance with the Therapeutic Products Directorate's *Guideline for Good Clinical Practice*.

Please note that Health Canada has implemented electronic reporting of adverse drug reactions and is currently in pilots with some sponsors. Those sponsors who have an established electronic connection with Canada Vigilance Production stream should submit their reports using the distribution rules provided to them by Health Canada, and reporting to multiple directorates is no longer required. For the sponsors who have not yet established this connection, they should continue submitting their reports to the applicable directorate by fax or by courier. The following website provides further clarification on Health Canada's adverse drug reactions reporting requirements for clinical trials:

[http://www.hc-sc.gc.ca/dhp-mps/alt\\_formats/pdf/prodpharma/applic-demande/guide-ld/ich/efficac/e2a\\_pre\\_notice\\_avis-eng.pdf](http://www.hc-sc.gc.ca/dhp-mps/alt_formats/pdf/prodpharma/applic-demande/guide-ld/ich/efficac/e2a_pre_notice_avis-eng.pdf)

Consistent with Health Canada's Notice - *Registration and Disclosure of Clinical Trial Information* of November 30, 2007, sponsors are encouraged to register their clinical trials within 21 days of the trial's onset, using a publicly available registry that conforms with international standards for registries such as: Clinicaltrials.gov ([www.clinicaltrials.gov](http://www.clinicaltrials.gov)); Current Controlled Trials ([www.controlled-trials.com](http://www.controlled-trials.com)).

Should you have any questions concerning this letter, please contact the Office of Clinical Trials (613) 941-2132.

Yours sincerely,

***This document has been signed electronically using the Health Canada docuBridge system.***

Larissa Lefebvre  
Acting Manager, Submission Management Division  
Office of Clinical Trials

LL/mw
